# Supplementary material for: How Can We Compare CI Systems across Manufacturers? A Scoping Review of Recent Literature
Source: Preprints.org preprint supplement (doi:10.20944/preprints202309.0505.v1), 2023-09-07
Supplement: Supplementary file 1 [file supplementary]

## Sheet: Main outcome
No	Title	Authors	Institution	Journal	Journal IF	Year of Publication	Sponsorship	Device(s) Type	Launch date of device	Subject N	Gender	Etiology	Onset of hearing loss/ duration	duration implanted ear [years]	Degree of hearing loss implanted ear	PTA	Age Range	Mean/Median Age	SD	Comments to age	Speech tests performed	Adaptive Y/N	Test condition/level	Test Interval	Additional Tests	Study value	Comments
1	Clinical Outcomes of the Cochlear™ Nucleus(®) 5 Cochlear Implant System and SmartSound™ 2 Signal Processing https://pubmed.ncbi.nlm.nih.gov/27310402/	Runge CL, Henion K, Tarima S, Beiter A	Medical College Wisconsin	Journal of the American Academy of Audiology	1.6	2016	Cochlear	Cochlear Nucleus 5, smart sound audio processor	2009-09-01	38		Not reported	mean 40.8 year (3 to 80 years) mean duration of deafness 22.8, ≤1to 71 years	22.8	Bilateral moderate to profound low frequency and profound mid to high frequencies. No post-op residual hearing reported. Threshold at 500=80, 1000=98, 2000=110.	96	18 - 89	63.6	N/A	N/A	AzBio (Q), AzBio (N), CNC	N	60dBA and 65dB with +5 SNR 0°	3, 6, 12 months	QOL - HU13	Has potential	Multicenter (13) collected Feb 2010-2012
2	Hearing and Quality-of-Life Outcomes After Cochlear Implantation in Adult Hearing Aid Users 65 Years or Older: A Secondary Analysis of a Nonrandomized Clinical Trial https://pubmed.ncbi.nlm.nih.gov/32857114/	Wick CC, Kallogjeri D, McJunkin JL, Durakovic N	Washington University St. Louis	JAMA Otolaryngology–Head & Neck Surgery	6.2	2020	Cochlear	Cochlear Nucleus CI 532	2015-03-01	70	51 males, 19 females	Unknown 30, Noise 24, Genetic 9, Other 3, Meningitis 2, Otosclerosis 2	Implanted ear duration median 28 year (10 - 66) duration of severe h.l. median 10 (10 - 66). Contralateral ear duration median 27, ( 8 - 66), severe hearing loss 10 (0 - 19)	28	Bilateral moderate to profound hearing loss with less than 20 years of profound deafness. Post-op not reported.	Not reported	65 - 91	74	N/A	N/A	CNC, AzBio	N	AzBio +10 SNR	6 months	SSQ
3	Controlled comparative clinical trial of hearing benefit outcomes for users of the Cochlear™ Nucleus 7 Sound Processor with mobile connectivity https://pubmed.ncbi.nlm.nih.gov/30714500/	Warren CD, Nel E, Boyd PJ	Cochlear Ltd, Sydney	Cochlear Implants International	1.3	2019	Cochlear	Cochlear Nucleus 7 processor with CI 24RE or later implant	2017-09-01	37	43.2% male 56.8% female	Not reported	Not reported	17.4	Out of 37 submects, 13 were implanted in Melbourne clinic of which 9 had residual hearing. Subject implanted in Sydney center of which there were 24 had no residual hearing. Post-op not reported.	Not reported	25 - 81	58.4	N/A	N/A	Client Oriented Scale of Improvement (COSI) CNC, SRT sentences	N	CNC 50 dBSPL, SRT sentences 65dBSPL	1 year of use of Nucleus 7	Phone test	Not much. Implant generations vary.	All subject had at least 6 months experience with N 5 or 6. Used N7 for 1 year at time of testing.
4	Multicenter US Clinical Trial With an Electric-Acoustic Stimulation (EAS) System in Adults: Final Outcomes https://pubmed.ncbi.nlm.nih.gov/29342054/	Pillsbury HC 3rd, Dillon MT, Buchman CA, Staecker H	University of North Carolina	Otology & Neurotology	2.3	2018	MED-EL	MED-EL Pulsar or Sonata	Pulsar 2004 Sonata June 2013	73	42.5% male 57.5% female	Not reported	duration of h.l. left 17.4 ± 10.63. Min/max (1-48), right ear 17.4 ± 10.30 Min/max (1- 48)	17.4	severe to profound hf hearing loss bilaterally. Threshold at 500=65, 1000=93, 2000=110.	89	17 - 76	53.7	N/A	N/A	CNC, CUNY	N	CUNY with 0,+5, +10 dB SNR	3,6, 12 months	QOL: Abbreviated Profile of Hearing Aid Benefit (APHAB); Hearing Device Satisfaction Scale (HDSS)	Implanted with Flex 24, had residual hearing	Multicenter (14) used PULSAR and Sonata implants
5	Longitudinal outcomes of cochlear implantation and bimodal hearing in a large group of adults: A multicenter clinical study https://pubmed.ncbi.nlm.nih.gov/33161258/	D. Kelsall, J. Lupo, A. Biever	Rocky Mountain Ear Center	American Journal of Otolaryngology–Head and Neck Medicine and Surgery	1.6	2021	Cochlear	Cochlear CI532 Nucleus 7 processor	2015-03-01	100	63% male 37% female	Not reported	Not more than 20 years of severe to profound h.l.	20	bilateral moderate sloping to profound. 85dBHL ± 15	85	23 -93	67	15	N/A	CNC, AzBio	N	CNC 60 dBA, AzBio 65dBA (+5, +10 dB SNR	3,6,12 months	None	High
6	Nucleus Hybrid S12: Multicenter Clinical Trial Results. https://pubmed.ncbi.nlm.nih.gov/32212342/	Dunn CC, Oleson J, Parkinson A, Hansen MR	University of Iowa	The Laryngoscope	2.4	2020	None	Cochlear Hybrid S12 10 mm array	2008	28	54% male 46% female	Familial 8 Noise 3 Ototoxicity 1 Trauma 1 Unknown 14 Viral 1	average 14.2 years SD 9.2 years	14.2	Severe to profound high frequency hearing loss; L.F. PTA bewteen 125 and 500 Hz ≤60dBHL, threshold average at 2, 3, 4 K ≥75 dBHL.	not reported	33.1 - 86.8	62.3	11.6	N/A	CNC, AzBio	N	CNC 60dbA AzBio +5dBSNR	Only 12 month data reported	Speech, spacial and qualities of hearing (SSQ)		This would be a subgroup. Hearing preservation is described which could be inconsistent with other publications. Degree of HP impacts performance. Group with Pillsbury entry 6
7	Multicenter clinical trial of the Nucleus Hybrid S8 cochlear implant: Final outcomes https://pubmed.ncbi.nlm.nih.gov/26756395/	Gantz BJ, Dunn C, Oleson J, Hansen M	University of Iowa	The Laryngoscope	2.4	2015	None	Cochlear Hybrid S8	2008	87	44.8 % male 55.2 % female	Unknown 47% Family history 25.3% Noise 17.2% Autoimmunite 2.3% Measles 2.3% Ototoxicity, neuritis, LAVS, Shers, Hydrops each 1.1%	duration of h.f. hearing loss was 23.6 years (SD 13.3, mean 22.8)	23.6	≥60dBHL at 125 and 250 Hz. Threshold average at 2,3 and 4 K ≥75dB. Threshold at 250=30, 500=42, 750=62, 1000=81.	53.75	19.6 - 82.3	59.8	N/A	N/A	CNC, BKB, APHAB	N		3,6,9 month. Second group tested at 1 year			This device generation is too old. Data was collected between 2002 and 2011
8	Benefits of Cochlear Implantation for Single-Sided Deafness: Data From the House Clinic-University of Southern California-University of California, Los Angeles Clinical Trial https://pubmed.ncbi.nlm.nih.gov/30358655/	Galvin JJ 3rd, Fu QJ, Wilkinson EP, Mills D	House Ear Institute	Ear & Hearing	3.6	2018	MED-EL provided implants	MED-EL Concerto 28	2010	10	5 male 5 female	8 Unknown 1 Labrynthitis 1 Vestibular neuritis	duration of deafness 3.2 ± 2.1 years	3.2	PTA ≥70dBHL implanted ear, contralateral PTA ≤25 dBHL with no threshld ≥35 dB	95	N/A	57.6	10.3	age of implantation	CNC, HINT	Y	60dBA, noise variable depending on 50% criteria	1,3,6 months	Localization, Tinnitus scale (VAS) Tinnitus Functional Index (TFI), Dizziness Handicap Inventory (DHI)Speech, Spacial and Qualities of Hearing Scale (SSQ), Glasgow Hearing Aid Benefit Profile (GHABP)
9	Cochlear implants in single-sided deafness - clinical results of a Swiss multicentre study https://pubmed.ncbi.nlm.nih.gov/31880806/	Peter N, Kleinjung T, Probst R, Hemsley C	University Hospital Zurich	Swiss Medical Weekly	1.1	2019	Cochlear	Cochlear CI 422	2009	10	6 male 4 female	Not reported	mean duration of SSD before inclusion date 1.3 years (range 0.5 - 4.3 SD .1.1) and before CI implantation 1.7 years (range 0.8 - 4.6 SD 1.1)	1.7	thresholds ≥70dBHL at .5, 1, 2 and 4 in implanted ear. 25dB or better from 125 - 2K and 35dBHL or better at 4 and 8k. Threshold at 500=85, 1000=95, 2000=95.	92	27.8 - 62.7	47	10.2	N/A	Oldenburg Sentences	Y	Adaptive level based on 50%, noise at 65 dB SPL	3,6, 12 months	Sound localization, Tinnitus Handicap Inventory (THI) SSQ	Dimished by Oldenburg unless we can find Large N with Oldenburg
10	Assessment of Speech Understanding After Cochlear Implantation in Adult Hearing Aid Users: A Nonrandomized Controlled Trial https://pubmed.ncbi.nlm.nih.gov/32857113/	Buchman CA, Herzog JA, McJunkin JL, Wick CC	Washington University St. Louis	JAMA Otolaryngology– Head & Neck Surgery	6.2	2020	Cochlear	Cochlear Ci 523 CP1000 processor	2015-03-01	96	65% male 45% female	Not reported	Duration of hearing loss in implant ear, mean (SD) [range], y 27 (14) [1-66] Duration of severe hearing loss in implant ear, mean (SD) [range], y 8 (6) [0-19] Duration of hearing loss in nonimplant ear, mean (SD) [range], y 27 (14) [2-66] Duration of severe hearing loss in nonimplant ear, mean (SD) [range], y 8 (6) [0-27]	27, 8	bilateral moderate sloping to profound or worse sensorineural hearing loss.	85	23 - 91	71	N/A	note change	CNC, AzBio	N	60 dBA	6 months	Health Utility Index, SSQ, Montral Cognitive Assessment
11	Outcome evaluation on cochlear implant users with residual hearing https://pubmed.ncbi.nlm.nih.gov/29214896/	Neben N, Buechner A, Schuessler M, Lenarz T	Hannover Medical School	Cochlear Implants International	1.3	2017	Cochlear	Cochlear Freedom Hybrid, CP900 processors Hybrid 24 or CI 422 implant	2008	40	Group 1 -13 female 11 male Group 2 - 8 female 6 male	Unknown 17 Familial 7 Noise 5 Mumps 1 Premature Otitis 2 Rubella 1 Ototoxicity 1 Accident 2		N/A	PTA is reported for each subject but not average is reported. PTA average given at 250, 500, 1000 and 1500 Hz for 38 subjects.	78.73	23 - 80	62	N/A	N/A	Freiburg Monosyllables, Oldenburg Sentences	Y	65 dBSPL Adaptive	3,6,9,12 weeks	Likert scale - satisfaction	cross-over study comparing processors
12	Cochlear Implantation in Cases of Asymmetric Hearing Loss: Subjective Benefit, Word Recognition, and Spatial Hearing https://pubmed.ncbi.nlm.nih.gov/32808881/	Dillon MT, Buss E, Rooth MA, King ER	University North Carolina	Trends in Hearing	3.3	2020	MED-EL	MED-EL Synchrony with Standard electrode array	2014	20	9 male 11 female	Not reported	Not reported	N/A	unaided PTA (500, 1000, and 2000 Hz) of _x0003_70 dB HL in the ear to be implanted and between 35 and 55 dB HL in the contralateral ear, Threshold at 500=85, 1000=90, 2000=85.	87	52 - 79	70	7	N/A	CNC, BKB, AzBio	Y	CNC and BKB 60 dBSPL, AzBio noise level varied, adaptive method	1, 2, 6, 9 and 12 months	Abreviated Profile of Hearing Aid Benefit (APHAB), SSQ, Tinnitus Handicap Inventory (THI)
13	Comparison of two cochlear implant coding strategies on speech perception https://pubmed.ncbi.nlm.nih.gov/27750737/	Dillon MT, Buss E, King ER, Deres EJ	University of North Carolina	Cochlear Implants International	1.3	2016	MED-EL	MED-EL Concerto 28	2010	22	Not reported	Not reported	reported for individual subjects only	N/A	Not reported	Not reported	over 18	N/A	N/A	N/A	CNC, HINT in quiet and noise, AzBio quiet and noise, BKB-SIN	N	60 dBSPL Noise at +10 SNR	1,3 and 6 months	None	2 groups of 11 people, compared HDCIS with FSP coding strategy	total but only 11 with FSP
14	Comparison of the Effects of Two Cochlear Implant Fine Structure Coding Strategies on Speech Perception https://pubmed.ncbi.nlm.nih.gov/32464082/	Müller V, Klünter HD, Fürstenberg D, Walger M	University of Cologne	American Journal of Audiology	1.5	2020	None	MED-EL Pulsar, Sonata and Concerto	Pulsar 2006, Sonata 2013, Concerto 2010	12	4 males 8 females	Not reported	minimum 9 months of CI experience at the time of testing	N/A	not reported	Not reported	46 - 77	59	N/A	N/A	Oldenburg Sentences, Gottingen Sentence Test	Y	65dBSPL, noise adaptive	12 weeks	SSQ	cross-over study comparing coding strategies FSP vs FSP4. Could collapse groups
15	Stable benefits of bilateral over unilateral cochlear implantation after two years: A randomized controlled trial https://pubmed.ncbi.nlm.nih.gov/27667732/	van Zon A, Smulders YE, Stegeman I, Ramakers GG	University Medical Center Utrecht	The Laryngoscope	3.3	2016	None	AB HiRes 90K with Harmony processor	2003	38	Unilateral CI 11 males 8 females BiCI 8 males 11 females	UCI/BiCI Hereitary 7/6 Unknown and progressive 9/16 Sudden 0/2 Head trauma 0/1 Meningitis 2/0 Rhesus antagonism 1/0 Sound exposure 0/1	not reported	N/A	Severe bilateral sensorineural hearing loss. right ear 106 dB ± 12, range 78 - 125, left ear 108 ± 13, range 83-127	107	26 - 67	30.5	12.5	age of onset severe hearing loss right ear. Did not report age at time of testing	SRT, Dutch phonemes, Utrecht sentence test with adapative randomized roving levels (U-STARR), speech intellegibility test weith spacially separated sources (SISSS), Localization testing	Y	Noise was roving at 65, 70 and 75 dB adaptive	1 and 2 years	SSQ	Dutch language
																	3 - 55	30.6	19.8	age of onset severe hearing loss left ear. Did not report age at time of testing
16	Evaluating long term hearing outcomes https://pubmed.ncbi.nlm.nih.gov/31135665/	Dayse Ta ́vora-Vieira, Gunesh P. Rajan, Paul Van de Heyning, and Griet Mertens	Antwerp, Perth	Otology & Neurotology	2.3	2019	None	MED-EL FLEX 28, FLEX soft and Standard Opus 2/Rondo	Type of implant not specified, only electrode array	33	15 males 18 females	Hydrops, Sudden Deafness, Labyrinthitis, Herpes zoster oticus, ISSNHL, Mumps, Fistula, Head trauma	duration of deafness 0.3 - 41 years	0.3-41	mean audiogram pure-tone average (PTA 500; 1000; 2000; 4000 Hz) of the contralateral ear was 17 dB_x0003_7.56 dB (range, 4–29 dB)	Not reported	23 - 79	53	N/A	N/A	BKB (Perth) Leuven Intellegibility Sentences (Antwerp)	Y	Adaptive 0dB SNR	Varied	SSQ
17	Spatial Speech-in-Noise Performance in Bimodal and Single-Sided Deaf Cochlear Implant Users https://pubmed.ncbi.nlm.nih.gov/31364496/	Ben Williges, Thomas Wesarg, Lorenz Jung, Leontien I. Geven, Andreas Radeloff, Tim Jueren	Oldenburg, Freiburg, Luebeck Germany	Trends in Hearing	3.3	2019	None	Cochlear, AB and MED-EL CI 422 (5) CI512 (5) CI 24RE (2) Hybrid L (1) Concerto (1) HiRES Hi Focus (1)	CI 422 2009, CI 512 2014, CI24 RE 2013 Hybrid L 2014, Concerto 2010, Hi Res 2003	16	9 males 7 females	Unknown (5) Sudden hearing loss (5) Meniere (2) Labyrintitis (1) Otitis Media (1) Ototoxicity (1) Otosclerosis (1)		N/A	PTA reported for individual subjects in non-implanted ear	Not reported					Oldenburg and Freiburger	Y	Adaptive	At least 1 year CI experience			total 8 bimodal 8 CI SSD
18	Outcomes for clinically representative cohort of hearing-impaired adults using the Nucleus CI 532 cochlear implant https://pubmed.ncbi.nlm.nih.gov/32140773/	Matthias Hey, Nicole Neben, Timo Stöver, Uwe Baumann, Alexander Mewes, Tim Liebscher, Mark Schüssler, Antje Aschendorff, Thomas Wesarg, Andreas Büchner, Paula Greenham & Ulrich Hoppe	Kiel, Hannover Frankfurt, Erlangen, Freiburg	European Archives of Oto-Rhino-Laryngology	2.5	2020	Cochlear	Cochlear CI532	2014-06-01	159	54 males 46 female	Chronic otitis media 1, Choesteatoma 1, Familial 4, Measles 1, Meniere's 4, Meningitis 2, Noise 1, Other 19, Otosclerosis 5, Ototoxicity 1, Rubella 2, Sudden 15, Unknown 94, Viral 2, Missing 7	duration of hearing loss for 148 subjects 23.9 years, SD 18 years, median 21 years, range 0 - 75 years	23.9	divided into age groups. >75: 92db, 65-75: not reported, 50-65: 94db, 25-50: 103db, <25: 110db	Not reported	14 - 91	56.6, 58	18	Age at implantation	Freiburg monosyllables at 65 dB SPL, HSM 65 dB with +10 SNR, Oldenburg or Gottingen Sentences at 65 dB SPL with noise	Y	65 dB SPL Adaptive	3 and 6 months	None	Retrospectively collected
19	Comparative Performance of Lateral Wall and Perimodiolar Cochlear Implant Arrays https://pubmed.ncbi.nlm.nih.gov/33710993/	Sturm, Joshua J.; Patel, Vir; Dibelius, Greg; Kuhlmey, Megan; Kim, Ana H.	Columbia University, Un. of Pennsylvania, New York Eye and Ear	Otology & Neurotology	2.3	2020	None	Cochlear, AB and MED-EL 5 LW designs: CI 422 (Cochlear), 1J (AB) Medium, Standard, Flex 28 (MED-EL) 2 PM designs: Contour (Cochlear) Mid Scalar (AB)	Retrospective study only specified electrode array type, not implant	119	52 males 67 females	Unknown 80, Genetic 15, Other 24	Not reported	N/A	reported only pre-op PTA: 1J 93 ±17,	94	N/A	56.8	22.9	1J (AB) N=14	CNC, Melody Contour Indentification (MCI)	N	50dB HL	3, 6, 12 and 24 months	None	Retrospectively collected
															Mid Scala 99±12		N/A	57.1	17.6	Mid Scala (AB) N=16
															CI422 98±12		N/A	63.5	18.4	CI 422 (C) N=17
															Contour 97±13		N/A	54.5	22.9	Contour (C) N=16
															Medium 88±15		N/A	59.8	17	Medium (ME) N=18
															Standard 95 ±11		N/A	58	23	Standard (ME) N=16
															Flex 91±12.2		N/A	59.2	21.3	FLEX 28 (ME) N=22
20	Understanding music with cochlear implants https://pubmed.ncbi.nlm.nih.gov/27558546/	Lisa Bruns, Dirk Mürbe , Anja Hahne	TU Dresden	Scientific Report	4.4	2016	MED-EL	Cohlear, AB and MED-EL: 23 MedEL users, 27 Cochlear users, 3 Advanced Bionics users		53	Post-ling 17 males, 21 females Pre-ling 8 males, 7 females	Not reported	not reported	N/A	not reported	Not reported	31 - 79	N/A	N/A	Post-ling	MuSIC	Unknown	Not reported	Not reported	Electrophysiology		, N = 15 preling, N = 38 post-ling; N = 53 normal hearing
																	23 - 70			Pre-ling
21	Cochlear implant treatment of patients with single sided deafness or asymetric hearing loss	S. Arndt · R. Laszig · A. Aschendorff · F. Hassepass · R. Beck · T. Wesarg	Freiburg	HNO	1.3	2017	Authors received financial support from all three manufacturers	Cochlear, AB and MED-EL: Cochlear: CI 24 RE, CI 512, CI 422 MED-EL Concerto Flex 28, Synchrony Flex 28, AB HiRes 90K, HiFocus MS	CI 24 RE 2013, CI 512 2014, CI 422 2009. Concerto 2010, Sychrony 2014, HiRES 2003, Hi Focus 2017	85 (45 SSD, 40 AHL)	SSD 18 males, 27 females AHL 22 males, 18 females	Not reported	SSD group median 18 months, range 1 - 408 months, AHL group median 40 months, range 4 - 480 months	1.5 , 3.33	SSD ≤30 dB from 125 Hz - 4K, AHL hearing loss in the better-hearing ear of ≤60 dB to 4 kHz and >30 dB in at least one frequency up to 4 kH. Implanted ear thresholds not reported but shown in graph.	108	22.5 - 68.3	45.3	N/A	SSD group	Oldenburg Sentences	Y	65 dB SPL Adaptive	12 months	SSQ, Localization	Retrospective from 2008	(combined SSD and AHL)
																	21.8 - 71.2	53.7	N/A	AHL group
22	Effects of Cochlear Implantation on Binaural Hearing in Adults With Unilateral Hearing Loss https://pubmed.ncbi.nlm.nih.gov/29732951/	Emily Buss , Margaret T. Dillon , Meredith A. Rooth , English R. King , Ellen J. Deres , Craig A. Buchman , Harold C. Pillsbury , and Kevin D. Brown	University of North Carolina, Washington University	Trends in Hearing	3.3	2018	None	MED-EL Standard, Opus 2	Implant type not specified, only electrode array and external processor	20	Not reported	Unknown 16, Meniere's 3, Trauma 1	Duration of deafness prior to implantation ranged from 0.6 to 6.6 years, with a mean of 2.6 years	2.6	moderate-to-profound hearing loss in the CI ear, thresholds of ≤35 dB HL 125 to 8000Hz in the NH ear. Threshold at 500=85, 1000=80, 2000=85.	83	23-66	50	N/A		CNC AzBio	N	Both 60 dBSPL	1, 3, 6, 9 and 12 months	Localization
23	A Randomized Controlled Crossover Study of the Impact of Online Music Training on Pitch and Timbre Perception in Cochlear Implant Users https://pubmed.ncbi.nlm.nih.gov/30815761/	Nicole T. Jiam, Mickael L. Deroche, Patpong Jilradejvong, Charles J. Limb	University of California San Francisco	Journal of the Accociation for Research in Otolaryngology	2.7	2019	None	Cochlear, AB and MED-EL: MED-EL (6), Cochlear (7), AB (6)	Devices listed vary between external processor, implant and electrode type.	20	Not reported	Idiopathic 9, Congenital 5, Menieres 1, Genetic 2, EVAS 1, Aging 1, Meningitis 1	age at profound hearing loss varied depending on the hearing loss etiology (3 to 71 years old). The duration of implant use ranged from 1 to 28 years	N/A	Not reported	Not reported	28–84	63	13		Pitch task, Timbre task	Unknown	Not reported	2 months: one month of audiobook training, 1 months of online music training	None	Study looked at the impact of acute training program on pitch discrim and timbre	CI users, 21 NH
24	The Sound of a Cochlear Implant Investigated in Patients With Single-Sided Deafness and a Cochlear Implant https://pubmed.ncbi.nlm.nih.gov/29889780/	Jeroen P. M. Peters, Anne W. Wendrich, Ruben H. M. van Eijl, Koenraad S. Rhebergen, Huib Versnel, and Wilko Grolman	University Medical Center Utrecht, Utrecht, The Netherlands	Otology & Neurotology	2.3	2018	Cochlear provided devices	Cochlear CI 422	2009	10	7 males, 14 females	Iatrogenetic 1, Sudden 3, Lbyrinthitis 1, Unknown 3, Menieres 2	minimum duration of deafness of 3 months and a maximum of 10 years as inclusion criteria. Mean and median of group not reported.	N/A	PTA in the implanted ear was minimum 70 dB hearing loss.	Not reported	24 - 68.2	N/A	N/A		CI condition and vocoded speech and music	N	65dB A	Not reported
25	Examination of Prosody and Timbre Perception in Adults With Cochlear Implants Comparing Different Fine Structure Coding Strategies https://pubmed.ncbi.nlm.nih.gov/29536106/	Verena Müller, Heinz Klünter, Dirk Fürstenberg, Hartmut Meister, Martin Walger, Ruth Lang-Rotha	University of Cologne, Germany	American Journal of Audiology	1.5	2018	MED-EL	MED-EL Sonata and Concerto	Sonata 2013, Concerto 2010	14	5 males, 9 females	Meningitis 1, Unknown 6, Genetic 4, Acute 1, Noise 2	mean experience with the CI of 27 months (range: 11–74 months) duration of deafness not reported	N/A	Not reported	Not reported	46–77	60	N/A		Prosoty, Timbre and Music Instrument identification	N	65dB SPL	12 weeks alternately using FSP and FS4 coding strategies. Tested 3 times in 12 weeks.	Speech tests conducted but not reported in this publication	Prospective, double blinded randomized
26	Perception in noise with the Digisonic SP cochlear implant: Clinical trial of Saphyr processor’s upgraded signal processinghttps://pubmed.ncbi.nlm.nih.gov/27246745/	F. Bergeron, M. Hotton	University Laval Quebec	European Annals of Otorhinolaryngology	1.9	2016	Oticon	Oticon Digisonic Saphyr speech processor		18	Not reported	Not reported			Not reported	Not reported	N/A	62	N/A		French Canadian HINT in quiet and noise	N	63dBA, noise at +10, +5,0dB SNR	Compared old strategy to new strategy. New stategy tested at fitting and again at 3 months	None	French Canadian HINT
27	Long-Term Influence of Electrode Array Length on Speech Recognition in Cochlear Implant Users https://pubmed.ncbi.nlm.nih.gov/32738069/	Michael W. Canfarotta, MD ; Margaret T. Dillon, AuD ; Craig A. Buchman,	UNC	The Laryngoscope	3.3	2020	MED-EL	MED-EL medium and standard array, implant varied	Implant type not specified	19	6 males, 13 females	Not mentioned in this publication, could probably find in original 2014 study	duration of moderate to profound hearing loss < 10 years	< 10	bilateral severe to profound	Not reported	54 - 73	63	N/A	medium array cohort	CNC, HINT in noise	N	60 dB SPL +10 SNR for HINT	This study started in 2008 and current publications is a 4 year follow-up from the original paper published in 2014		Grant from MED-EL
														N/A			48 - 76	61	N/A	standard array cohort
28	Prospective Multicentric Follow-up Study of Cochlear Implantation in Adults With Single-Sided Deafness: Tinnitus and Audiological Outcomes https://pubmed.ncbi.nlm.nih.gov/32176124/	Christine Poncet-Wallet, Elisabeth Mamelle, Benoit Godey,	French mulitcenter (6)	Otology & Neurotology	2.3	2019	Oticon provdided devices	Digisonic SP 20 channel system	2012	23	Not reported	Sensorineural hearing loss 9 (35%), trauma 5 (19%), middle ear surgery 4 (15%), unknown 8 (31%), incapacitating tinnitus was entry criteria	Not reported	N/A	SSD (PTA hearing thresholds at 0.5, 1, 2, and 4 kHz ≥70 dB HL in the poorer ear and <35 dB HL at 2 kHz in the better ear)	Not reported	N/A	N/A	N/A		French monosyllables, Oticon provided implants at no charge	N	-3 /+5 SNR	13 months post-op	Tinnitus handicap scale, Tinnitus reaction questionnaire, subjective tinnitus severity scale	French CNC's
29	Comparison of Bilateral and Unilateral Cochlear Implantation in Adults A Randomized Clinical Trial https://pubmed.ncbi.nlm.nih.gov/26796630/	Yvette E. Smulders, MD; Alice van Zon, MD; Inge Stegeman, PhD;	University Medical Center lead center in 5 center multicenter study Utrecht,	JAMA Otolaryngol Head Neck Surg.	6.2	2016	Advanced Bionics	AB HiRes 90K, Harmony processor	2003	38	Unilateral 11 males, 8 females, Bilateral 11 males, 8 females	Unilateral/Bilateral: Hereditary 7/9, unknown and progressive 9/6, sudden 0/2, trauma 0/1, meningitis 2/0, Rhesus 1/0, sound exposure 0/1	duration of severe to profound hearing loss of less than 20 years in each ear and a difference in duration of hearing loss between the 2 ears of less than 10 years	<20	At start of severe hearing loss Unilateral right ear mean 30.8, SD 20.1 range 3-55, bilateral right ear mean 30.5, SD 17.2 range 3-63 Unilateral left ear mean 30.6, SD 19.8, range 3-55 bilateral left ear mean 30.0, SD 17.5, range 3-63 RE: Threshold at 500=84, 1000=97, 2000=104. PTA=95dB; LE: Threshold at 500=86, 1000=99, 2000=107. PTA=97dB	96	26 -67	52.2	12.5	Unilateral CI	Utrecht Senteence Test with roving (adaptive) noise, Speech intellegibility test with spacally separated sources, CNC	Y	Adaptive	Patients were implanted between 2010 and 2012. Outcome data collected 1 year post-op	Localization	Dutch language	19 bilateral, 19 unilateral
																	18 -70	47.7	15.9	Bilateral
30	Perceptions of Sound Quality and Enjoyment After Cochlear Implantation https://pubmed.ncbi.nlm.nih.gov/34595365/	Sarah Y. Bessen, James E. Saunders, Eric A. Eisen, Isabelle L. Magro	USC Medical Center	OTO Open	-	2021	None	Not reported	Implant type not specified	59	29 males, 30 females	Not reported	Duration of deafness prior to implantation, 29.1 years, SD 15.7	29.1		Not reported	N/A	62.51	15.7		Survey included patient characteristics, hearing status, experience related to quality of sound, enjoyment of sound (modified HISQUI)	Unknown	Not applicable	Patients were implanted between 2000 and 2019. Asked to complete survey based on experience soon after implantation and current assesssment			respondants to questionnaire
31	Impact of music on the quality of life of cochlear implant users: a focus group study https://pubmed.ncbi.nlm.nih.gov/28326996/	Giorgos Dritsakis , Rachel M. van Besouw, Aoife O’ Meara	University of Southampton	Cochlear Implants International	1.3	2017	None	AB, Cochlear, MED-EL Neurelec: 12 AB, 9 MED-EL, 6 Cochlear, 2 Neurelec, 1 not reported	Implant type not specified	30	12 males, 18 females	24 post-lingual, 5 pre-lingual, 1 unspecified	not reported	N/A	Not reported	Not reported	18 - 81	49.5	N/A		Focus group 3 groups of users: bilateral, bimodal and unilateral	Unknown	Not applicable	Duration of use between 1 year and 18 years			total: implanted bilaterally, unilaterally and bimodally
32	Self-reported music perception is related to quality of life and self-reported hearing abilities in cochlear implant users https://pubmed.ncbi.nlm.nih.gov/34470590/	Christina Fuller,Rolien Free, Bert Maat, Deniz Başkent	Groningen, University Medical Center, Netherlands	Cochlear Implants International	1.3	2021	None	AB, Cochlear: 1 Cochlear CI 22, 73 cochlear CI 24R, 24 HiRes	CI 22 1990, CI 24R 2013, Hi RES 2003	98	39 males, 59 females	Not reported	Mean duration hearing impairment 37.9 years ± 18.6	37.9	Not reported	Not reported	18 to 85	65.6	11.9		Participants filled three questionnaires: (1) the Dutch Musical Background Questionnaire (DMBQ), which measures the music listening habits, the quality of the sound of music and the selfassessed perception of elements of music; (2) the Nijmegen Cochlear Implant Questionnaire (NCIQ), which measures health-related QoL; (3) the Speech, Spatial and Qualities (SSQ) of hearing scale, which measures sel…	Not applicable	Not applicable				, 35% bimodal
33	Music Is More Enjoyable With Two Ears, Even If One of Them Receives a Degraded Signal Provided By a Cochlear Implant https://pubmed.ncbi.nlm.nih.gov/31469701/	David M. Landsberger, Katrien Vermeire,Natalia Stupak,	New York University	Ear & Hearing	3.6	2021	None	Cochlear, MED-EL 3: CI24RE, 1 CI512, 4 Pulsar, 2 COMBI 40+, 2 Sonata	CI24RE 2013, CI 512 2014, Pulsar 2004. COMBI 40+ 2001, Sonata 2013	12	7 males, 5 females	4 unknown, 2 idiopathic, 1 viral, 1 labyrinthitis, 2 meningitis, 2 trauma	Duration of deafness 1 - 6 years in implanted ear, contralateral ear was normal hearing	2022-01-06	Not reported	Not reported	29 - 68	57	N/A		MUSHRA- compare implant ear with contralateral normal hearing ear	Unknown	Not reported	Duration of use 8 months to 10 years
34	Effect of instrument timbre on musical emotion recognition in normal-hearing listeners and cochlear implant users https://pubmed.ncbi.nlm.nih.gov/32611176/	Xin Luo and Brendon Warner	Arizona State University	The Journal of the Acoustical Society of America	1.8	2020	None	Cochlear, AB: 3 Nucleus 6, 3 Nucleus 7, 3 HiRes 90K	Nucleus 6 2013, Nucleus 7 2017, HiRES 90K 2003	9	2 males, 7 females	1 ototoxic, 4 unknown, 2 genetic, 1 hereditary, 1 meningitis	Not reported	N/A	Not reported	Not reported	50 - 78	64	N/A		4 computer generated instruments played separately	Unknown	Not reported	Duration of use 1 to 18 years	sharper temporal onsets of piano and trumpet may allow for better perception of tempo cues for musical emotion recognition, compared to the violin and organ.
35	Reduction of the Harmonic Series Influences Musical Enjoyment With Cochlear Implants https://pubmed.ncbi.nlm.nih.gov/27755358/	John S. Nemer, Gavriel D. Kohlberg, Dean M. Mancuso, Brianna M. Griffin, Michael V. Certo, Stephanie Y. Chen, Michael B. Chun, Jaclyn B. Spitzer, and Anil K. Lalwani	Columbia University	Otology & Neurotology	2.3	2016	AB provided simulation software	AB, Cochlear	Implant type not specified	8	CI users 2 males, 6 females	Not reported	Not reported	N/A	Not reported	Not reported	35 - 74	62	14.1	CI Users	music samples with harmonics manipulated via software	N	Subjects rated samples on a scale: natural/unnatural, pleasant/unpleasant, sounds like music/does not sound like music	Not reported			20 normal hearing, 4 AB HiRes90K, 1 Cochlear CI 422, 2 cochlear CI 24RE, 1 Cochlear CI 522
																	23 - 31	25	2.5	Normal hearing
36	Musical and vocal emotion perception for cochlear implants users https://pubmed.ncbi.nlm.nih.gov/30181063/	S. Paquette, G.D. Ahmed, M.V. Goffi-Gomez, A.C.H. Hoshino, I. Peretz A. Lehmann	University of Montreal, Quebec Canada	Hearing Research	3.2	2018	None	Cochlear 8 Freedom, 1 Nucleus 24, MED-EL 1 Sonata,Oticon 1 Digisonic	Freedom 2005, Sonata 2013, Nucleus 2000, Digisonic 2012	11	5 males, 6 females	Not reported	Length of hearing deprivation mean 13.2, range 1 - 28 years	13.2	Not reported	Not reported	21 - 62	49	N/A		Music samples stimuli that allowed vocal and musical auditory emotions to be comparatively assessed	N	evaluate emotion perception in cochlear implant users (Experiment 1) and to investigate emotion perception in natural versus cochlear implant hearing in the same participants with a validated cochlear implant simulation approach (Experiment 2).	Duration of use 1.7 - 10 years			8 Cochlear Freedom, 1 MED-EL Sonata, 1 Cochlear Nucleus 24, 1 Oticon Digisonic
37	A Retrospective Multicenter Study Comparing Speech Perception Outcomes for Bilateral Implantation and Bimodal Rehabilitation https://pubmed.ncbi.nlm.nih.gov/25695925/	Peter J. Blamey, Bert Maat, Deniz Başkent, Deborah Mawman et al	Lead author Melbourn, Austraila CI center	Ear & Hearing	3.6	2015	None	Not reported	Implant type not specified	2247	Not reported	Not reported			Not reported	Not reported for implanted ear	N/A	N/A	N/A		speech in quiet and noise	Not reported	Percentile ranking used as a way of normalizing data due to different languages, presentation levels and noise conditions	Not reported		Could be high due to N of subjects but details are lacking	Total, 1572 tested in unilateral condition
38	One-year follow up of auditory performance in post-lingually deafened adults implanted with the Neurelec Digisonic® SP/Saphyr® Neo cochlear implant system https://pubmed.ncbi.nlm.nih.gov/26779331/	Déborah Borger, Geneviève Lina-Granade, Stéphanie Verneyre, Hung Thai-Van, Donia Saai, Michel Hoen, Dan Gnansia, Eric Truy	Lyon, France	Audiology Research	-	2015	Oticon	Oticon Digisonic SP/ Saphyr speech processor	2012	10	4 males, 6 females	4 Unknown, 1 Otspongiosis, 1 accident, 1 genetic, 1 malformation, 1 evolutive, 1 sudden	deafness duration (N=7; M=3.57; SD=3.10; Min=1 y; Max=10 y)	3.57	Threshold at 500=95, 1000=95, 2000=99. PTA=96dB	96	34 - 70	55.9	11.06	N=10	words in quiet and noise, speech in quiet	N	65dB SPL	3, 6 and 12 months		Compared outcomes of 3 different speech processors: Saphyr, Digisonic and Convex
39	Straight vs. modiolar hugging electrodes – Does one perform better than the other? https://pubmed.ncbi.nlm.nih.gov/25614265/	Jayesh Doshi, Peter Johnson, Deborah Mawman, Kevin Green, Iain Bruce, Simon Freeman, Simon Lloyd	Manchester, UK	Cochlear Implants International	1.3	2015	Cochlear	Cochlear CI422 implant	2009	32	Not reported	Not reported	not reported	N/A	not reported	Not reported	Not reported	N/A	N/A		BKB sentences in quiet 70 dB, and in noise +10 SNR	N	70 dB	3 and 9 months		Compared perrformance between straight and perimodiolar. No difference found.
40	Outcomes of Cochlear Implantation in Adults with Asymmetric Hearing Loss https://pubmed.ncbi.nlm.nih.gov/25569365/	Emily Franko-Tobin, Phillip Ryan Camilon, Elizabeth Camposeo, Meredith A. Holcomb, and Ted A. Meyer	University of South Carolina, Charleston	Otology and Neurotology	2.3	2015	Cochlear, AB, MED-EL	Cochlear (8), AB (7) and MED-EL (20)	Device type not specified	35	Not reported	Not reported	average duration of hearing loss of 8.5 years. Moderate to severe group mean 12.7 SD 13.7, moderate to profound group mean 3.3, SD 4.5, Severe to profound group mean 7.9, SD 8.0	8.5	Implanted ear: moderate to severe group mean 83.8 SD 5.2, moderate profound group, mean 86.4, SD 14.8, severe to profound group mean 88.9 SD 12.4. Contralateral ear, moderate to severe group mean 61.5, SD 9.6, moderate to profound group mean71.4 SD 33.9, severe to profound group mean 95.1 SD 15.1	86	N/A	66.6	18.6	Age at implantation: moderate to severe group	CNC in quiet, HINT, AzBio	N	60 dB	6 and 12 months		Compared groups with differing pre-op residual hearing. Group with better pre-op performed better post-op
																	N/A	52	20.2	Age at implantation: moderate to profound group
																	N/A	62.4	17.1	Age at implantation: severe to profound group
41	Hearing Preservation and Improved Speech Perception With a Flexible 28-mm Electrode https://pubmed.ncbi.nlm.nih.gov/25299833/	Silke Helbig, Matthias Helbig, Martin Leinung, Timo Stover, Uwe Baumann, and Tobias Rader	Goethe University, Frankfurt, Germany	Otology and Neurotology	2.3	2015	MED-EL support in preparing article	Med-El Concerto with FLEX 28 electrode	2010	34	13 males, 21 females	Not reported		N/A	measurable preoperative residual hearing, with preoperative thresholds better or equal to 80 dB at 125 and 250 Hz, and better or equal to 90 dB at 500 Hz	Not reported	33.4 - 86.5	68.3, 62.7	N/A		Freiburg monosyllables, OLSA in noise	Yes for OLSA	65dB Freiburg	3 and 6 months	None	Retrospective analysis of patients implanted between Oct. 2011 and Dec. 2012
42	The Impact of Cochlear Implantation on Speech Understanding, Subjective Hearing Performance, and Tinnitus Perception in Patients with Unilateral Severe to Profound Hearing Loss https://pubmed.ncbi.nlm.nih.gov/25594387/	Dayse Ta´vora-Vieira, Roberta Marino, Aanand Acharya, and Gunesh P. Rajan	University of Western Australia, Perth	Otology and Neurotology	2.3	2015	MED-EL support in statistical analyis and editing	MED-EL FLEX 28 and 31.5 electrode		28	13 males, 15 females	11 idiopathic sudden sensorineural hearing loss, 3 post-traumatic, 9 unknown, 1 iatrogenetic, 1 Meniere's, 1 ototoxic, 1 mumps, 1 fistula	0.3 to 40 years. Mean not calculated	N/A	Only reported for non-implanted ear	Not reported	38 to 74	N/A	N/A		BKB	Yes for OLSA	65 dB	3, 6, 12 and 24 months	SSQ, APHAB, Tinnitus Reaction Questionnaire	speech perception in noise is improved with CI use. CI use improves the subjective perception of hearing in UD subjects and decreases the disturbance of tinnitus, which may in turn contribute to an overall positive subjective impression of benefits in this group of subjects.
																89.4675
																12.4567
																53.75
																108
